# Supplementary material for: Can Radiomics Provide Additional Information in [18F]FET-Negative Glioma?
Source: Preprints.org preprint supplement (doi:10.20944/preprints202209.0133.v1), 2022-09-09
Supplement: Supplementary file 1 [file Supplement_S1_Wilcoxon_Table_220515.xlsx]

## Sheet: TBR20-40
	TBR 20-40
			Whole Cohort			Isometabolic			Photopenic
			BG	Tumor	P-Value	BG	Tumor	P-Value	BG	Tumor	P-Value
	firstorder	10Percentile	0.741931	0.738249	0.935	0.754945	0.814174	0.01	0.719731	0.616768	0.002
		90Percentile	1.15525	1.16287	0.814	1.14782	1.19709	0.058	1.16793	1.10729	0.013
		Energy	3185.25	3189.92	0.772	1550.69	1621.7	0.033	5973.61	8273.37	0.381
		Entropy	2.31672	2.35695	0.379	2.23969	2.22704	0.689	2.44814	2.56014	0.062
		InterquartileRange	0.217379	0.226752	0.339	0.209177	0.199101	0.294	0.23137	0.270537	0.009
		Kurtosis	3.13136	2.96558	0.232	3.18896	3.12062	0.837	3.0331	2.69327	0.022
		Maximum	1.42759	1.44711	0.249	1.3609	1.42652	0.01	1.54136	1.47367	0.031
		MeanAbsoluteDeviation	0.128487	0.132591	0.409	0.122815	0.119167	0.496	0.138162	0.153666	0.055
		Mean	0.954486	0.953743	0.943	0.958042	1.01168	0.018	0.94842	0.860772	0.004
		Median	0.962992	0.956773	0.823	0.968247	1.01828	0.037	0.954028	0.858195	0.004
		Minimum	0.42897	0.461092	0.167	0.458553	0.545843	0.005	0.378506	0.327454	0.136
		Range	0.998621	0.986019	0.611	0.902345	0.880673	0.358	1.16286	1.14622	0.758
		RobustMeanAbsoluteDeviation	0.0904188	0.0939207	0.334	0.0869827	0.0831309	0.347	0.0962804	0.110942	0.011
		RootMeanSquared	0.96863	0.969063	0.883	0.970863	1.02321	0.019	0.964819	0.882049	0.005
		Skewness	-0.21452	-0.0915195	0.125	-0.292223	-0.19362	0.358	-0.081968	0.0654133	0.21
		TotalEnergy	26842.9	26882.3	0.772	13068.1	13666.5	0.033	50341.2	48304.9	0.266
		Uniformity	0.238649	0.232211	0.367	0.250815	0.254809	0.538	0.217894	0.196462	0.022
		Variance	0.0273745	0.0286651	0.362	0.0248164	0.0233445	0.51	0.0317384	0.0369589	0.055
	glcm	Autocorrelation	28.9719	24.9334	0.1	27.15	23.3964	0.239	32.0798	27.3899	0.332
		ClusterProminence	124.174	125.526	0.422	99.5842	76.1438	0.51	166.12	203.653	0.068
		ClusterShade	-3.16924	0.48516	0.057	-4.40752	-1.76757	0.284	-1.05687	3.97646	0.136
		ClusterTendency	5.71161	5.97608	0.391	5.15478	4.67854	0.496	6.66149	8.04212	0.068
		Contrast	0.775423	0.802295	0.356	0.751054	0.762981	0.787	0.816994	0.839666	0.287
		Correlation	0.73438	0.730475	0.706	0.711343	0.691566	0.456	0.773678	0.798381	0.076
		DifferenceAverage	0.595217	0.611516	0.317	0.585468	0.593119	0.888	0.611848	0.624032	0.266
		DifferenceEntropy	1.27188	1.29065	0.409	1.25407	1.26446	0.627	1.30226	1.30951	0.332
		DifferenceVariance	0.389035	0.397937	0.422	0.377035	0.382762	0.658	0.409506	0.412306	0.356
		Id	0.730023	0.723672	0.272	0.732904	0.729848	0.957	0.725109	0.720886	0.266
		Idm	0.720278	0.7132	0.317	0.723728	0.720332	0.871	0.714394	0.709389	0.266
		Idmn	0.989003	0.988671	0.339	0.987532	0.987108	0.567	0.991513	0.991326	0.619
		Idn	0.938484	0.936615	0.136	0.934984	0.933131	0.417	0.944455	0.943356	0.463
		Imc1	-0.276844	-0.272229	0.935	-0.268483	-0.253248	0.37	-0.291107	-0.314879	0.093
		Imc2	0.821157	0.8184	0.635	0.802005	0.787185	0.581	0.853828	0.872413	0.076
		InverseVariance	0.459294	0.466098	0.174	0.458411	0.461797	0.738	0.4608	0.462929	0.266
		JointAverage	5.08036	4.76501	0.1	4.90355	4.61363	0.247	5.38197	5.00665	0.287
		JointEnergy	0.09657	0.0933288	0.367	0.104131	0.107372	0.482	0.083671	0.0731177	0.084
		JointEntropy	3.92263	3.9797	0.297	3.79835	3.77009	0.673	4.13465	4.27936	0.163
		MCC	0.75891	0.750123	0.917	0.743452	0.71805	0.265	0.785279	0.806771	0.102
		MaximumProbability	0.184426	0.176684	0.448	0.195096	0.201283	0.284	0.166223	0.140263	0.031
		SumAverage	10.1607	9.53003	0.1	9.80711	9.22726	0.247	10.7639	10.0133	0.287
		SumEntropy	3.13809	3.16975	0.461	3.03936	2.99913	0.581	3.30651	3.43477	0.049
		SumSquares	1.62176	1.69459	0.367	1.47646	1.36038	0.51	1.86962	2.22045	0.068
	gldm	DependenceEntropy	6.30257	6.29818	0.9	6.15307	6.10087	0.405	6.55762	6.61633	0.332
		DependenceNonUniformity	201.908	229.981	0.051	100.944	96.5266	0.51	374.139	606.557	0.003
		DependenceNonUniformityNormalized	0.0636406	0.0640895	0.781	0.0651043	0.0640221	0.347	0.0611436	0.0640119	0.084
		DependenceVariance	21.7013	21.5554	0.866	21.4722	21.975	0.524	22.0921	21.1754	0.463
		GrayLevelNonUniformity	774.292	777.586	0.448	387.923	379.762	0.336	1433.39	1967.81	0.554
		GrayLevelVariance	1.70061	1.78142	0.373	1.54822	1.46621	0.456	1.96058	2.27175	0.055
		HighGrayLevelEmphasis	29.1457	25.5011	0.127	27.1173	23.6085	0.214	32.6061	28.4873	0.381
		LargeDependenceEmphasis	143.046	138.912	0.391	134.85	132.835	0.888	157.027	160.312	0.435
		LargeDependenceHighGrayLevelEmphasis	4035.94	3352.64	0.025	3616.73	3066.52	0.17	4751.05	4200.31	0.246
		LargeDependenceLowGrayLevelEmphasis	9.14981	9.74177	0.207	9.63191	9.87643	0.381	8.32741	9.98254	0.309
		LowGrayLevelEmphasis	0.0697242	0.0724071	0.184	0.078295	0.0798187	0.358	0.0551034	0.0605172	0.266
		SmallDependenceEmphasis	0.0269281	0.0294412	0.203	0.0297422	0.0340068	0.214	0.0221275	0.0211468	0.758
		SmallDependenceHighGrayLevelEmphasis	0.802205	0.772144	0.917	0.791438	0.782855	0.77	0.820571	0.716312	0.463
		SmallDependenceLowGrayLevelEmphasis	0.00287876	0.00329002	0.481	0.00356092	0.00439593	0.117	0.00171507	0.00147448	0.113
	glrlm	GrayLevelNonUniformity	424.363	435.708	0.764	222.915	218.123	0.347	768.01	943.725	0.868
		GrayLevelNonUniformityNormalized	0.224929	0.218912	0.317	0.236057	0.237593	0.77	0.205946	0.189418	0.031
		GrayLevelVariance	1.83337	1.90492	0.356	1.6622	1.59991	0.51	2.12537	2.37824	0.049
		HighGrayLevelRunEmphasis	29.0194	25.7125	0.157	26.8543	23.48	0.206	32.7128	29.2518	0.523
		LongRunEmphasis	4.01681	3.90557	0.422	3.73887	3.68177	0.854	4.49094	4.95126	0.435
		LongRunHighGrayLevelEmphasis	113.542	95.5357	0.026	100.082	84.772	0.157	136.503	135.15	0.309
		LongRunLowGrayLevelEmphasis	0.266308	0.278589	0.245	0.279504	0.286028	0.43	0.243797	0.29357	0.356
		LowGrayLevelRunEmphasis	0.0729802	0.0747942	0.245	0.082123	0.083963	0.358	0.0573836	0.0600738	0.407
		RunEntropy	3.8767	3.88257	0.723	3.73605	3.70504	0.611	4.11662	4.22554	0.136
		RunLengthNonUniformity	867.764	983.911	0.022	463.798	451.802	0.888	1556.88	1963.65	0.004
		RunLengthNonUniformityNormalized	0.457094	0.466596	0.334	0.469424	0.477035	0.888	0.436061	0.436306	0.356
		RunPercentage	0.620173	0.627419	0.441	0.633464	0.638737	0.804	0.597501	0.594333	0.435
		RunVariance	1.15857	1.12636	0.574	1.02557	1.01457	0.689	1.38547	1.57983	0.492
		ShortRunEmphasis	0.687495	0.696264	0.282	0.697732	0.70421	0.871	0.670032	0.666662	0.266
		ShortRunHighGrayLevelEmphasis	20.1578	18.1684	0.282	18.802	16.6049	0.206	22.4706	20.0485	0.906
		ShortRunLowGrayLevelEmphasis	0.0517196	0.0529674	0.307	0.0591436	0.0609163	0.405	0.0390552	0.0395638	0.868
	glszm	GrayLevelNonUniformity	7.65708	7.89941	0.188	5.26527	5.73882	0.058	11.7372	11.3559	0.758
		GrayLevelNonUniformityNormalized	0.163283	0.164506	0.334	0.174203	0.17882	0.23	0.144655	0.142478	0.981
		GrayLevelVariance	4.51242	4.59662	0.789	3.90828	3.8999	0.721	5.54302	5.73045	0.906
		HighGrayLevelZoneEmphasis	29.805	29.0385	0.857	26.5318	24.2074	0.23	35.3888	36.7169	0.266
		LargeAreaEmphasis	58022.7	65207.2	0.188	20152.2	17931	0.256	122625	544976	0.943
		LargeAreaHighGrayLevelEmphasis	1.69182e+06	1.63156e+06	0.035	664260	439433	0.03	3.44472e+06	1.63095e+07	0.795
		LargeAreaLowGrayLevelEmphasis	2661.46	3452.72	0.232	923.84	1026.06	0.443	5625.65	22335.4	0.266
		LowGrayLevelZoneEmphasis	0.142638	0.139446	0.789	0.154118	0.162138	0.469	0.123055	0.103534	0.619
		SizeZoneNonUniformity	6.51654	7.57427	0.051	4.42567	5.48313	0.027	10.0833	10.618	0.435
		SizeZoneNonUniformityNormalized	0.127952	0.146393	0.021	0.135466	0.157284	0.039	0.115136	0.126365	0.356
		SmallAreaEmphasis	0.306845	0.340242	0.096	0.308769	0.346668	0.191	0.303563	0.325185	0.435
		SmallAreaHighGrayLevelEmphasis	9.29192	9.82187	0.619	8.2244	8.19875	0.658	11.113	12.2408	0.266
		SmallAreaLowGrayLevelEmphasis	0.0477767	0.0510978	0.806	0.05217	0.0633586	0.265	0.0402823	0.0312998	0.163
		ZoneEntropy	4.80129	4.79124	0.416	4.4214	4.43127	0.804	5.44935	5.37563	0.076
		ZonePercentage	0.0247748	0.0273973	0.379	0.029638	0.0349524	0.098	0.0164789	0.0144291	0.21
		ZoneVariance	53727.5	60523.7	0.292	17704.2	15968.2	0.611	115179	510670	0.906
	ngtdm	Busyness	5.12022	5.4943	0.12	3.04889	3.23977	0.157	8.65367	10.8014	0.407
		Coarseness	0.0128595	0.0132762	0.69	0.0178686	0.0189654	0.482	0.00431464	0.0040458	0.795
		Complexity	13.8944	12.7911	0.24	11.5893	10.414	0.133	17.8266	15.9889	0.868
		Contrast	0.0203006	0.0215932	0.091	0.0220112	0.022456	0.738	0.0173825	0.0199747	0.028
		Strength	0.31447	0.278278	0.24	0.402586	0.367221	0.294	0.164156	0.128094	0.687

## Sheet: TBR 5-15
	TBR 5-15
			Whole Cohort			Isometabolic			Photopenic
			BG	Tumor	P-Value	BG	Tumor	P-Value	BG	Tumor	P-Value
	firstorder	10Percentile	0.67971	0.643773	0.038	0.690806	0.714121	0.673	0.660782	0.531217	0.003
		90Percentile	1.22149	1.19086	0.122	1.20106	1.21432	0.94	1.25633	1.15228	0.01
		Energy	3284.78	2983.57	0.049	1556.31	1482.76	0.804	6233.35	8031.63	0.062
		Entropy	2.25734	2.27766	0.706	2.16052	2.15806	0.754	2.4225	2.46412	0.287
		InterquartileRange	0.287622	0.291989	0.682	0.275339	0.261489	0.23	0.308574	0.34053	0.031
		Kurtosis	3.39424	3.07592	0.24	3.12034	3.10553	0.567	3.8615	2.98339	0.007
		Maximum	1.70198	1.70515	0.474	1.53233	1.61217	0.09	1.99138	1.84322	0.492
		MeanAbsoluteDeviation	0.170284	0.171572	0.789	0.159959	0.156025	0.469	0.187895	0.195824	0.149
		Mean	0.956492	0.913822	0.021	0.953823	0.962701	0.94	0.961044	0.835122	0.001
		Median	0.960726	0.908338	0.006	0.962771	0.960795	0.552	0.957238	0.824183	<,001
		Minimum	0.31344	0.312006	0.883	0.368865	0.403992	0.284	0.218892	0.164889	0.124
		Range	1.38854	1.39315	0.666	1.16347	1.20818	0.325	1.77248	1.67834	0.586
		RobustMeanAbsoluteDeviation	0.11911	0.121128	0.706	0.113605	0.109034	0.222	0.128502	0.140269	0.039
		RootMeanSquared	0.981558	0.940161	0.021	0.975609	0.983361	0.854	0.991706	0.870246	0.001
		Skewness	-0.0170576	0.155946	0.01	-0.155283	0.0861035	0.004	0.218739	0.255998	0.723
		TotalEnergy	27681.7	25143.3	0.049	13115.4	12495.6	0.804	52530.1	45630.1	0.019
		Uniformity	0.250519	0.246251	0.69	0.265456	0.268971	0.524	0.225038	0.210279	0.102
		Variance	0.0495728	0.0480555	0.961	0.0424267	0.0401193	0.721	0.0617632	0.0601259	0.653
	glcm	Autocorrelation	22.2694	19.2742	0.023	19.2787	17.7055	0.496	27.3711	21.7954	0.004
		ClusterProminence	129.862	95.3671	0.53	78.5872	64.1794	0.82	217.33	142.82	0.586
		ClusterShade	1.58306	2.90314	0.005	-2.23312	1.56257	<,001	8.09301	4.85967	0.758
		ClusterTendency	5.33375	5.08701	0.857	4.60471	4.17086	0.658	6.5774	6.54816	0.381
		Contrast	0.793897	0.839757	0.566	0.737025	0.812059	0.611	0.890913	0.85198	0.653
		Correlation	0.70812	0.697226	0.848	0.681866	0.659766	0.738	0.752907	0.763631	0.435
		DifferenceAverage	0.600355	0.623451	0.345	0.577227	0.609108	0.524	0.639809	0.627348	0.906
		DifferenceEntropy	1.27954	1.30307	0.35	1.24325	1.27844	0.417	1.34145	1.3169	0.723
		DifferenceVariance	0.397764	0.410369	0.706	0.370292	0.397023	0.37	0.444627	0.419223	0.266
		Id	0.729045	0.721024	0.307	0.736285	0.726205	0.581	0.716694	0.72027	0.795
		Idm	0.718921	0.709724	0.302	0.727294	0.715579	0.538	0.704638	0.708587	0.868
		Idmn	0.988204	0.988085	0.891	0.985808	0.986344	0.381	0.992292	0.991066	0.309
		Idn	0.936908	0.935544	0.806	0.931275	0.931436	0.524	0.946516	0.943414	0.492
		Imc1	-0.256938	-0.249066	0.987	-0.249786	-0.233828	0.443	-0.269137	-0.28639	0.227
		Imc2	0.79698	0.792541	0.848	0.775202	0.764135	0.738	0.834129	0.842693	0.381
		InverseVariance	0.457884	0.464094	0.195	0.45328	0.459343	0.611	0.465736	0.462382	0.407
		JointAverage	4.50718	4.19764	0.014	4.19178	4.03478	0.37	5.04521	4.45867	0.002
		JointEnergy	0.10234	0.0990772	0.706	0.112457	0.113029	0.611	0.0850815	0.0788887	0.381
		JointEntropy	3.86451	3.91359	0.566	3.70396	3.73305	0.957	4.13841	4.16438	0.619
		MCC	0.733647	0.719181	0.474	0.711063	0.689566	0.336	0.772173	0.772766	0.758
		MaximumProbability	0.191707	0.18726	0.926	0.204966	0.213846	0.144	0.169088	0.147838	0.177
		SumAverage	9.01437	8.39527	0.014	8.38357	8.06957	0.37	10.0904	8.91734	0.002
		SumEntropy	3.07073	3.08508	0.698	2.95446	2.93884	0.871	3.26908	3.31291	0.287
		SumSquares	1.53191	1.48169	0.866	1.33543	1.24573	0.673	1.86708	1.85003	0.407
	gldm	DependenceEntropy	6.23893	6.22137	0.611	6.09189	6.04643	0.347	6.48977	6.50955	0.586
		DependenceNonUniformity	203.502	226.874	0.054	101.705	97.412	0.787	377.155	586.699	0.006
		DependenceNonUniformityNormalized	0.062947	0.0648731	0.454	0.0639129	0.0657286	0.957	0.0612991	0.0630169	0.356
		DependenceVariance	21.892	21.1295	0.236	21.9744	21.2521	0.456	21.7513	21.3589	0.758
		GrayLevelNonUniformity	807.672	844.848	0.764	406.166	397.966	0.496	1492.59	2090.08	0.981
		GrayLevelVariance	1.61009	1.56328	0.926	1.38845	1.31841	0.658	1.98818	1.93535	0.653
		HighGrayLevelEmphasis	22.7704	20.23	0.043	19.5579	18.4637	0.552	28.2507	23.0091	0.006
		LargeDependenceEmphasis	142.952	137.947	0.232	138.45	131.067	0.358	150.631	160.286	0.906
		LargeDependenceHighGrayLevelEmphasis	3079.45	2511.69	<,001	2630.16	2218.17	0.17	3845.88	3237.01	0.01
		LargeDependenceLowGrayLevelEmphasis	10.5914	12.0479	0.059	12.0757	12.0431	0.905	8.05936	12.8518	<,001
		LowGrayLevelEmphasis	0.0813019	0.0903497	0.096	0.0964785	0.0981552	0.705	0.0554124	0.0777274	0.001
		SmallDependenceEmphasis	0.0278876	0.0297249	0.883	0.0294874	0.0333871	0.284	0.0251585	0.0226995	0.149
		SmallDependenceHighGrayLevelEmphasis	0.742472	0.740748	0.978	0.621716	0.750498	0.247	0.948467	0.686659	0.068
		SmallDependenceLowGrayLevelEmphasis	0.0030475	0.00330347	0.379	0.0038723	0.00412507	0.77	0.00164047	0.00188867	0.492
	glrlm	GrayLevelNonUniformity	445.938	463.683	0.996	234	227.719	0.43	807.479	1002.88	0.831
		GrayLevelNonUniformityNormalized	0.235439	0.230425	0.537	0.249847	0.249508	0.738	0.210859	0.20011	0.113
		GrayLevelVariance	1.76413	1.71257	0.926	1.49449	1.4593	0.871	2.22412	2.10044	0.943
		HighGrayLevelRunEmphasis	22.9869	20.803	0.096	19.5238	18.8037	0.658	28.8947	23.982	0.028
		LongRunEmphasis	3.99065	3.894	0.258	3.80738	3.64764	0.284	4.3033	4.86641	0.795
		LongRunHighGrayLevelEmphasis	87.5918	73.7486	0.002	72.8437	63.8159	0.214	112.75	102.386	0.013
		LongRunLowGrayLevelEmphasis	0.305001	0.344983	0.078	0.345666	0.347846	0.854	0.235631	0.379971	<,001
		LowGrayLevelRunEmphasis	0.0843386	0.0925561	0.136	0.100486	0.102229	0.787	0.056793	0.0768996	0.002
		RunEntropy	3.82084	3.81031	0.682	3.67726	3.63819	0.315	4.06577	4.14385	0.523
		RunLengthNonUniformity	891.23	973.357	0.023	463.583	454.551	0.247	1620.75	1963.33	0.015
		RunLengthNonUniformityNormalized	0.458408	0.46879	0.211	0.46458	0.480611	0.294	0.447878	0.4357	0.981
		RunPercentage	0.621178	0.629485	0.263	0.628826	0.641773	0.336	0.608132	0.59473	0.906
		RunVariance	1.14481	1.12094	0.345	1.04603	0.998269	0.336	1.31332	1.5556	0.868
		ShortRunEmphasis	0.68842	0.696894	0.184	0.69313	0.705719	0.275	0.680385	0.666639	0.906
		ShortRunHighGrayLevelEmphasis	16.1697	14.9826	0.277	13.6638	13.6291	0.991	20.4446	16.7333	0.022
		ShortRunLowGrayLevelEmphasis	0.0594558	0.0651504	0.16	0.0714448	0.0736431	0.905	0.039004	0.0502743	0.01
	glszm	GrayLevelNonUniformity	8.39541	8.85152	0.294	5.63635	5.62708	0.81	13.102	13.9426	0.193
		GrayLevelNonUniformityNormalized	0.172534	0.17252	0.421	0.190994	0.185656	0.829	0.141043	0.151636	0.287
		GrayLevelVariance	4.53169	4.51001	0.987	3.54688	3.79851	0.705	6.21165	5.65195	0.463
		HighGrayLevelZoneEmphasis	27.7577	28.1746	0.385	21.956	23.8772	0.315	37.6547	35.0653	0.906
		LargeAreaEmphasis	56094.3	63161.7	0.461	20326.6	20625.3	0.15	117110	479445	0.795
		LargeAreaHighGrayLevelEmphasis	1.38595e+06	1244179,47+CC11+CM11	0.207	432438	388968	0.991	3.01253e+06	9.90894e+06	0.356
		LargeAreaLowGrayLevelEmphasis	2802.26	4064.03	0.069	1248.9	1386.98	0.627	5452.11	29610.9	0.031
		LowGrayLevelZoneEmphasis	0.14551	0.144553	0.682	0.175041	0.161757	0.496	0.0951329	0.117754	0.049
		SizeZoneNonUniformity	7.88396	7.896	0.916	4.46954	4.4227	0.848	13.7086	12.9397	0.831
		SizeZoneNonUniformityNormalized	0.139058	0.137001	0.968	0.13787	0.137511	0.873	0.141085	0.131912	0.619
		SmallAreaEmphasis	0.316636	0.323379	0.441	0.296707	0.313042	0.239	0.350633	0.331946	0.653
		SmallAreaHighGrayLevelEmphasis	9.74081	9.89828	0.164	7.12826	8.32127	0.043	14.1975	12.1406	0.653
		SmallAreaLowGrayLevelEmphasis	0.0464585	0.0422465	0.806	0.0542663	0.0470381	0.854	0.0331393	0.0332628	0.831
		ZoneEntropy	4.76031	4.79833	0.77	4.35533	4.41469	0.923	5.45116	5.43556	0.758
		ZonePercentage	0.0261954	0.028087	0.559	0.0299888	0.0343162	0.738	0.0197244	0.0171351	0.124
		ZoneVariance	52465.8	59385	0.397	17962.7	18344	0.068	111324	452899	0.868
	ngtdm	Busyness	5.60675	6.10319	0.674	3.94523	3.71302	0.567	8.44111	12.0952	0.177
		Coarseness	0.0121374	0.0118702	0.604	0.0168745	0.0168472	0.443	0.0040564	0.00378507	0.795
		Complexity	14.9444	14.7513	0.635	9.62472	11.1915	0.17	24.0191	19.7117	0.246
		Contrast	0.0210567	0.0202809	0.544	0.0243002	0.0215331	0.064	0.0155236	0.0179271	0.177
		Strength	0.250775	0.234265	0.516	0.268455	0.294603	0.854	0.220616	0.129173	0.093

## Sheet: TTPmin
	TPPmin
			Whole Cohort			Isometabolic			Photopenic
			BG	Tumor	P-Value	BG	Tumor	P-Value	BG	Tumor	P-Value
	firstorder	10Percentile	15.1265	17.3831	<,001	15.4278	17.9935	0.001	14.6124	16.4478	0.028
		90Percentile	34.6667	34.6667	1	34.6667	34.6667	1	34.6667	34.6667	1
		Energy	2.99357e+06	3.48403e+06	<,001	1.3966e+06	1.46753e+06	0.002	5.71781e+06	9.42588e+06	0.01
		Entropy	1.84193	1.67243	<,001	1.79721	1.60372	0.003	1.78069	1.64427	0.076
		InterquartileRange	12.2627	9.87817	0.002	11.9479	8.99795	0.005	12.7999	11.0582	0.191
		Kurtosis	3.19129	4.49686	0.002	3.22758	4.98926	0.006	3.12939	3.86481	0.149
		Maximum	34.6667	34.6667	1	34.6667	34.6667	1	34.6667	34.6667	1
		MeanAbsoluteDeviation	7.17283	6.38623	<,001	7.00691	6.13246	<,001	7.45587	6.7116	0.076
		Mean	28.1313	29.2158	<,001	28.2828	29.5805	0.002	27.8729	28.7069	0.062
		Median	32.549	33.6192	0.007	32.5073	34.0413	0.039	32.62	32.9883	0.066
		Minimum	4.41327	4.36933	0.61	4.90077	4.49949	0.398	3.58163	3.77772	0.317
		Range	30.2534	30.2974	0.61	29.7659	30.1672	0.398	31.0851	30.889	0.317
		RobustMeanAbsoluteDeviation	5.5347	4.71961	<,001	5.42238	4.38449	0.001	5.72631	5.1071	0.113
		RootMeanSquared	29.4278	30.2652	<,001	29.5334	30.5631	0.002	29.2477	29.8508	0.093
		Skewness	-1.09328	-1.39587	0.001	-1.10487	-1.50912	0.004	-1.07352	-1.25511	0.177
		TotalEnergy	2.52276e+07	2.93608e+07	<,001	1.17695e+07	1.23673e+07	0.002	4.81855e+07	5.73941e+07	0.01
		Uniformity	0.407345	0.460668	<,001	0.418175	0.482009	0.003	0.406792	0.44896	0.124
		Variance	72.3055	60.7294	<,001	69.5636	57.5575	0.001	76.9827	65.104	0.044
	glcm	Autocorrelation	32.9544	36.0248	<,001	32.0199	36.5247	0.003	26.1014	27.2513	0.084
		ClusterProminence	156.377	119.091	<,001	140.016	113.051	0.017	97.1072	71.306	0.015
		ClusterShade	-16.1865	-14.379	0.174	-14.1824	-14.1549	0.888	-12.5119	-9.86674	0.028
		ClusterTendency	6.82405	5.47325	<,001	6.50874	5.14355	0.001	5.41792	4.47881	0.039
		Contrast	2.74147	2.31096	<,001	2.69479	2.17081	0.002	2.08731	1.83923	0.136
		Correlation	0.418643	0.397032	0.096	0.406149	0.390321	0.596	0.437312	0.423984	0.163
		DifferenceAverage	0.955556	0.833722	<,001	0.940856	0.793138	0.002	0.833826	0.749017	0.076
		DifferenceEntropy	1.83714	1.69533	<,001	1.80558	1.63657	0.004	1.74568	1.62575	0.055
		DifferenceVariance	1.72755	1.51686	0.001	1.69214	1.44128	0.003	1.34095	1.20071	0.227
		Id	0.719188	0.749654	<,001	0.723179	0.759841	0.004	0.733908	0.757718	0.055
		Idm	0.680717	0.715708	<,001	0.685237	0.727454	0.004	0.700542	0.727954	0.055
		Idmn	0.953669	0.960988	<,001	0.953546	0.963329	<,001	0.954009	0.959243	0.113
		Idn	0.899402	0.912071	<,001	0.899964	0.916197	0.001	0.900209	0.909868	0.068
		Imc1	-0.112388	-0.113184	0.848	-0.116524	-0.119213	0.51	-0.107406	-0.11519	0.795
		Imc2	0.544168	0.51818	0.007	0.544194	0.517292	0.031	0.531926	0.516474	0.356
		InverseVariance	0.204293	0.188564	0.008	0.201544	0.183615	0.05	0.230606	0.216594	0.084
		JointAverage	5.62753	5.90782	<,001	5.54431	5.95305	0.003	5.01608	5.14421	0.068
		JointEnergy	0.246325	0.30627	0.001	0.256221	0.329606	0.007	0.243023	0.289655	<,001
		JointEntropy	3.44641	3.09483	<,001	3.3573	2.94861	0.004	3.33605	3.05998	<,001
		MCC	0.461506	0.446726	0.223	0.461786	0.451317	0.754	0.456163	0.450486	0.523
		MaximumProbability	0.461371	0.520029	<,001	0.468129	0.541175	0.005	0.460507	0.502712	0.084
		SumAverage	11.2551	11.8156	<,001	11.0886	11.9061	0.003	10.0322	10.2884	0.068
		SumEntropy	2.57071	2.32768	<,001	2.51347	2.23298	0.003	2.5072	2.31698	0.084
		SumSquares	2.39138	1.94605	<,001	2.30088	1.82859	0.001	1.87631	1.57951	0.055
	gldm	DependenceEntropy	5.82479	5.64047	<,001	5.75181	5.5731	0.002	5.84627	5.64042	0.055
		DependenceNonUniformity	141.962	166.502	0.611	70.3515	67.5454	0.094	263.862	611.654	0.076
		DependenceNonUniformityNormalized	0.0441426	0.0455267	0.297	0.045128	0.0450862	0.206	0.0421098	0.0481086	0.381
		DependenceVariance	49.9141	52.5019	0.033	47.2173	50.9968	0.112	53.0889	54.5783	0.149
		GrayLevelNonUniformity	1372.62	1721.81	<,001	620.428	705.787	0.002	2766.24	4762.75	0.015
		GrayLevelVariance	2.44749	2.03909	<,001	2.35095	1.93095	0.001	1.92339	1.62803	0.068
		HighGrayLevelEmphasis	34.2129	36.8943	<,001	33.3043	37.2992	0.004	26.9961	28.0266	0.084
		LargeDependenceEmphasis	207.344	236.427	<,001	194.483	226.886	0.007	238.096	273.3	0.025
		LargeDependenceHighGrayLevelEmphasis	8757.99	10437.4	<,001	7906.34	9894.18	0.004	7942.46	9245.12	0.031
		LargeDependenceLowGrayLevelEmphasis	6.73784	6.65541	0.523	6.48444	6.56796	0.658	9.86325	9.78601	0.981
		LowGrayLevelEmphasis	0.0645938	0.0530006	<,001	0.0650867	0.0501099	0.003	0.077329	0.0660638	0.055
		SmallDependenceEmphasis	0.0515235	0.047436	0.008	0.0545992	0.0484948	0.003	0.0381143	0.0360717	0.758
		SmallDependenceHighGrayLevelEmphasis	1.07578	1.03369	0.219	1.11298	1.08827	0.482	0.615222	0.572984	0.309
		SmallDependenceLowGrayLevelEmphasis	0.0071567	0.00647064	0.017	0.00797649	0.00620664	<,001	0.00581107	0.00596882	0.381
	glrlm	GrayLevelNonUniformity	436.513	472.272	0.167	233.538	232.607	0.381	832.365	1149.23	0.177
		GrayLevelNonUniformityNormalized	0.267901	0.2959	<,001	0.286993	0.324257	0.004	0.257593	0.272569	0.136
		GrayLevelVariance	2.73192	2.44192	<,001	2.61762	2.32734	0.003	2.15838	1.93815	0.084
		HighGrayLevelRunEmphasis	29.6497	31.9633	<,001	29.2852	32.7847	0.003	22.971	23.7562	0.124
		LongRunEmphasis	6.0028	7.70245	<,001	5.27761	6.70642	0.006	7.67488	10.9023	0.039
		LongRunHighGrayLevelEmphasis	238.966	323.52	<,001	200.372	274.292	0.001	247.161	363.994	0.044
		LongRunLowGrayLevelEmphasis	0.248002	0.262131	0.714	0.230259	0.240662	0.567	0.366705	0.422014	0.435
		LowGrayLevelRunEmphasis	0.0818971	0.0695496	<,001	0.0810331	0.0650396	0.003	0.0989025	0.0868295	0.084
		RunEntropy	3.7373	3.73336	0.495	3.61618	3.60813	0.854	3.83624	3.89211	0.136
		RunLengthNonUniformity	795.907	761.559	0.002	435.773	372.406	0.001	1310.42	1541.06	0.723
		RunLengthNonUniformityNormalized	0.440388	0.414063	<,001	0.445294	0.414382	0.005	0.412235	0.38421	0.017
		RunPercentage	0.561413	0.525389	<,001	0.576629	0.535226	0.005	0.520219	0.478928	0.025
		RunVariance	2.44502	3.33149	<,001	1.92821	2.57328	0.007	3.51979	5.4733	0.049
		ShortRunEmphasis	0.680818	0.656332	<,001	0.683403	0.653804	0.004	0.659694	0.635354	0.017
		ShortRunHighGrayLevelEmphasis	17.8492	18.4865	0.085	17.8478	19.17	0.068	13.1874	12.965	0.492
		ShortRunLowGrayLevelEmphasis	0.0657946	0.0553856	<,001	0.0655839	0.0511615	0.002	0.0761482	0.0671894	0.113
	glszm	GrayLevelNonUniformity	32.9823	33.8315	0.454	18.2073	17.1863	0.222	54.6857	57.0858	0.554
		GrayLevelNonUniformityNormalized	0.195976	0.202008	0.277	0.199619	0.208221	0.117	0.226112	0.226023	0.687
		GrayLevelVariance	2.53558	2.47616	0.287	2.47135	2.34853	0.074	1.7226	1.73628	0.687
		HighGrayLevelZoneEmphasis	18.5122	19.2255	0.071	18.1805	19.6343	0.033	13.4682	13.1768	0.435
		LargeAreaEmphasis	26467.3	39228.5	<,001	10041.4	13201.7	0.004	72665.2	548499	0.093
		LargeAreaHighGrayLevelEmphasis	1.21069e+06	1.82158e+06	<,001	447941	596207	<,001	2.56384e+06	1.91365e+07	0.113
		LargeAreaLowGrayLevelEmphasis	614.711	884.755	0.016	251.261	327.775	0.074	2174.3	16257.9	0.246
		LowGrayLevelZoneEmphasis	0.158448	0.154939	0.034	0.160985	0.147976	0.004	0.19234	0.199292	0.246
		SizeZoneNonUniformity	36.6637	36.9827	0.619	21.2376	18.2172	0.002	48.1607	49.2523	0.332
		SizeZoneNonUniformityNormalized	0.212684	0.209479	0.926	0.219297	0.211113	0.304	0.18731	0.196035	0.163
		SmallAreaEmphasis	0.454748	0.445287	0.682	0.458705	0.4383	0.082	0.424666	0.439058	0.246
		SmallAreaHighGrayLevelEmphasis	8.17529	8.2005	0.53	7.91457	8.18447	0.538	5.64668	5.6035	0.795
		SmallAreaLowGrayLevelEmphasis	0.0766482	0.0752546	0.287	0.0828822	0.0724912	0.01	0.0810438	0.0926957	0.149
		ZoneEntropy	4.86491	4.79775	0.117	4.61717	4.52647	0.275	5.0985	5.10597	0.227
		ZonePercentage	0.0589735	0.0561596	0.066	0.0639527	0.0586435	0.058	0.0392852	0.0377917	0.554
		ZoneVariance	26114.8	38766	<,001	9735.86	12764.8	0.004	71941.1	542388	0.093
	ngtdm	Busyness	15.2033	15.176	0.005	7.84077	6.81235	0.001	33.897	38.7775	0.795
		Coarseness	0.00493362	0.00621407	0.756	0.00703726	0.00864912	0.456	0.00148165	0.00137177	0.193
		Complexity	17.4842	16.3557	0.059	16.9878	15.8502	0.127	11.3231	10.5047	0.332
		Contrast	0.101519	0.0769389	<,001	0.100496	0.0702	<,001	0.0907866	0.0742094	0.102
		Strength	0.178386	0.224484	<,001	0.252412	0.330424	<,001	0.0378826	0.036698	0.619
