# Supplementary material for: Can Radiomics Provide Additional Information in [18F]FET-Negative Glioma?
Source: Preprints.org preprint supplement (doi:10.20944/preprints202209.0133.v1), 2022-09-09
Supplement: Supplementary file 2 [file Supplement_S2_Univariate_AUC.xlsx]

## Sheet: Tabelle1
Whole cohort				Isometabolic gliomas				Photopenic gliomas
Spalte1	univMean	univStd		Spalte1	univMean	univStd		Spalte1	univMean	univStd
TTP_min_glrlm_HighGrayLevelRunEmphasis	0.693837	0.118954		TTP_min_glrlm_HighGrayLevelRunEmphasis	0.719089	0.144491		TBR5to15_firstorder_10Percentile	0.863889	0.148288
TTP_min_glcm_JointAverage	0.684114	0.123343		TTP_min_glcm_JointAverage	0.716356	0.144786		TBR5to15_firstorder_Median	0.848444	0.162902
TTP_min_glcm_SumAverage	0.684114	0.123343		TTP_min_glcm_SumAverage	0.716356	0.144786		TBR5to15_firstorder_Mean	0.830667	0.16744
TTP_min_gldm_LowGrayLevelEmphasis	0.681472	0.123374		TTP_min_glcm_Autocorrelation	0.715222	0.143157		TBR5to15_firstorder_RootMeanSquared	0.802667	0.183428
TTP_min_glcm_Autocorrelation	0.67878	0.123151		TBR5to15_firstorder_Skewness	0.708644	0.138659		TBR20to40_firstorder_10Percentile	0.778111	0.188831
TTP_min_gldm_HighGrayLevelEmphasis	0.678119	0.123462		TBR20to40_firstorder_Mean	0.704422	0.147468		TBR20to40_firstorder_Median	0.762667	0.205511
TTP_min_glrlm_LowGrayLevelRunEmphasis	0.669215	0.119894		TTP_min_gldm_HighGrayLevelEmphasis	0.703867	0.14493		TBR20to40_firstorder_Mean	0.755333	0.206356
TBR5to15_glcm_ClusterShade	0.667442	0.117871		TBR20to40_firstorder_RootMeanSquared	0.700756	0.149607		TBR20to40_firstorder_RootMeanSquared	0.754556	0.207411
TBR5to15_firstorder_Skewness	0.659506	0.118778		TTP_min_glrlm_LowGrayLevelRunEmphasis	0.692444	0.14402		TBR20to40_firstorder_Kurtosis	0.754	0.185316
TTP_min_glrlm_ShortRunLowGrayLevelEmphasis	0.659072	0.122808		TTP_min_gldm_LowGrayLevelEmphasis	0.6918	0.146612		TBR5to15_glcm_JointAverage	0.748222	0.190443
TTP_min_glcm_Idmn	0.647516	0.127165		TTP_min_glrlm_LongRunHighGrayLevelEmphasis	0.6918	0.137791		TBR5to15_glcm_SumAverage	0.748222	0.190443
TTP_min_glrlm_LongRunHighGrayLevelEmphasis	0.642963	0.11927		TBR5to15_glcm_ClusterShade	0.690467	0.139911		TBR5to15_gldm_LowGrayLevelEmphasis	0.748222	0.186281
TTP_min_gldm_LargeDependenceHighGrayLevelEmphasis	0.640741	0.121702		TBR20to40_firstorder_10Percentile	0.689644	0.146261		TBR20to40_firstorder_InterquartileRange	0.734667	0.203805
TTP_min_glcm_ClusterTendency	0.639531	0.129231		TTP_min_glrlm_ShortRunLowGrayLevelEmphasis	0.688244	0.141051		TBR5to15_gldm_LargeDependenceLowGrayLevelEmphasis	0.729222	0.200625
TTP_min_ngtdm_Contrast	0.639412	0.128957		TTP_min_glszm_LowGrayLevelZoneEmphasis	0.682556	0.144915		TBR5to15_glcm_Autocorrelation	0.728111	0.198231
TBR20to40_glszm_SizeZoneNonUniformityNormalized	0.635674	0.120145		TTP_min_gldm_LargeDependenceHighGrayLevelEmphasis	0.677622	0.143096		TBR20to40_firstorder_RobustMeanAbsoluteDeviation	0.727667	0.212055
TTP_min_glcm_SumSquares	0.635299	0.130869		TTP_min_glcm_Idmn	0.676289	0.137945		TBR5to15_glrlm_LowGrayLevelRunEmphasis	0.720444	0.196332
TTP_min_firstorder_MeanAbsoluteDeviation	0.634158	0.12805		TTP_min_gldm_SmallDependenceLowGrayLevelEmphasis	0.6728	0.141169		TTP_min_glszm_SmallAreaEmphasis	0.719667	0.215086
TBR20to40_glszm_SmallAreaEmphasis	0.631156	0.114398		TTP_min_glrlm_RunVariance	0.672756	0.136939		TBR5to15_glrlm_ShortRunLowGrayLevelEmphasis	0.719556	0.196856
TTP_min_firstorder_Kurtosis	0.630054	0.124845		TBR20to40_firstorder_90Percentile	0.667422	0.1479		TBR20to40_glcm_ClusterTendency	0.716444	0.215275
TTP_min_glcm_ClusterProminence	0.630049	0.126112		TBR20to40_firstorder_Median	0.666667	0.15287		TTP_min_glszm_SizeZoneNonUniformityNormalized	0.714444	0.212077
TTP_min_glrlm_ShortRunEmphasis	0.628593	0.124282		TBR20to40_firstorder_Minimum	0.659867	0.149219		TBR5to15_glrlm_LongRunLowGrayLevelEmphasis	0.712	0.206067
TBR5to15_gldm_LargeDependenceHighGrayLevelEmphasis	0.628138	0.107781		TTP_min_glszm_HighGrayLevelZoneEmphasis	0.658356	0.149925		TBR20to40_firstorder_MeanAbsoluteDeviation	0.712	0.217336
TTP_min_glcm_Idn	0.62641	0.128157		TTP_min_firstorder_Kurtosis	0.658111	0.146962		TBR20to40_firstorder_Uniformity	0.712	0.217336
TTP_min_firstorder_Variance	0.626114	0.127583		TBR20to40_glszm_SizeZoneNonUniformityNormalized	0.652211	0.153765		TBR20to40_firstorder_Variance	0.711778	0.217907
TTP_min_gldm_GrayLevelVariance	0.625995	0.128557		TTP_min_firstorder_Skewness	0.6516	0.146852		TBR20to40_gldm_GrayLevelVariance	0.711778	0.217907
TTP_min_firstorder_Mean	0.624296	0.126841		TTP_min_ngtdm_Contrast	0.650311	0.143986		TBR5to15_gldm_HighGrayLevelEmphasis	0.711444	0.201502
TTP_min_glcm_SumEntropy	0.624227	0.127973		TTP_min_glcm_Idn	0.649844	0.142164		TBR20to40_glrlm_GrayLevelNonUniformityNormalized	0.709111	0.217692
TTP_min_gldm_LargeDependenceEmphasis	0.62238	0.121409		TTP_min_gldm_SmallDependenceEmphasis	0.648378	0.141512		TBR20to40_glcm_SumEntropy	0.708778	0.213426
TTP_min_glrlm_RunLengthNonUniformityNormalized	0.621951	0.122946		TTP_min_glrlm_LongRunEmphasis	0.647267	0.140342		TBR20to40_glcm_SumSquares	0.707222	0.216025
TBR5to15_glcm_JointAverage	0.621773	0.115412		TTP_min_glrlm_ShortRunEmphasis	0.643089	0.150034		TBR20to40_glcm_ClusterProminence	0.705333	0.211459
TBR5to15_glcm_SumAverage	0.621773	0.115412		TTP_min_gldm_LargeDependenceEmphasis	0.640956	0.14465		TBR20to40_firstorder_Entropy	0.703222	0.216638
TTP_min_firstorder_Skewness	0.621615	0.127431		TTP_min_glcm_Idm	0.640511	0.141131		TBR20to40_glcm_Correlation	0.701111	0.197669
TTP_min_glcm_JointEntropy	0.621407	0.127392		TTP_min_firstorder_RobustMeanAbsoluteDeviation	0.639311	0.142198		TTP_min_glcm_ClusterProminence	0.700333	0.193121
TTP_min_firstorder_RootMeanSquared	0.621002	0.126288		TTP_min_glrlm_RunPercentage	0.6388	0.146073		TBR5to15_glrlm_LongRunHighGrayLevelEmphasis	0.696222	0.204132
TTP_min_glcm_Idm	0.620138	0.128003		TTP_min_firstorder_MeanAbsoluteDeviation	0.636956	0.14262		TBR20to40_glrlm_GrayLevelVariance	0.696	0.214816
TTP_min_firstorder_10Percentile	0.619968	0.124475		TTP_min_glcm_JointEnergy	0.6366	0.146783		TBR5to15_gldm_LargeDependenceHighGrayLevelEmphasis	0.692	0.203943
TTP_min_glrlm_GrayLevelNonUniformityNormalized	0.619017	0.127043		TTP_min_glcm_Id	0.636489	0.141693		TBR5to15_firstorder_Kurtosis	0.691556	0.204089
TTP_min_gldm_DependenceEntropy	0.618415	0.12109		TTP_min_glcm_MaximumProbability	0.636133	0.145945		TBR5to15_firstorder_InterquartileRange	0.687556	0.212587
TTP_min_glrlm_LongRunEmphasis	0.618202	0.11991		TTP_min_glcm_ClusterTendency	0.636044	0.14518		TBR5to15_glrlm_HighGrayLevelRunEmphasis	0.686222	0.202836
TBR5to15_firstorder_Median	0.61802	0.112182		TTP_min_glcm_DifferenceAverage	0.635711	0.140238		TBR20to40_glcm_Imc2	0.685667	0.202805
TTP_min_firstorder_InterquartileRange	0.61802	0.129004		TTP_min_glszm_SmallAreaLowGrayLevelEmphasis	0.635556	0.154119		TBR5to15_firstorder_Minimum	0.682222	0.213435
TTP_min_glcm_Id	0.616859	0.128419		TTP_min_firstorder_InterquartileRange	0.634344	0.144645		TBR5to15_firstorder_RobustMeanAbsoluteDeviation	0.681111	0.213006
TTP_min_firstorder_Entropy	0.616662	0.127388		TTP_min_firstorder_Mean	0.633844	0.14444		TBR5to15_firstorder_90Percentile	0.680444	0.216941
TBR5to15_glcm_Autocorrelation	0.616647	0.116856		TTP_min_glcm_SumSquares	0.633644	0.148233		TBR20to40_glcm_MCC	0.680222	0.205784
TTP_min_glcm_DifferenceAverage	0.616425	0.129181		TBR20to40_glszm_SmallAreaEmphasis	0.633422	0.151619		TBR20to40_ngtdm_Contrast	0.672667	0.207991
TTP_min_glrlm_RunPercentage	0.616336	0.122183		TTP_min_glcm_JointEntropy	0.633244	0.142897		TTP_min_glcm_ClusterTendency	0.671222	0.208272
TTP_min_glrlm_RunVariance	0.616138	0.118898		TTP_min_firstorder_RootMeanSquared	0.632822	0.144564		TBR5to15_glszm_LowGrayLevelZoneEmphasis	0.668889	0.212033
TTP_min_glcm_Contrast	0.615793	0.130446		TTP_min_glrlm_RunLengthNonUniformityNormalized	0.6328	0.149059		TTP_min_glcm_ClusterShade	0.666	0.216637
TTP_min_firstorder_RobustMeanAbsoluteDeviation	0.614291	0.12836		TTP_min_glcm_SumEntropy	0.632622	0.144509		TTP_min_gldm_GrayLevelVariance	0.662667	0.208247
TTP_min_glcm_MaximumProbability	0.613975	0.127705		TTP_min_glcm_Contrast	0.631156	0.140528		TBR20to40_glcm_MaximumProbability	0.661222	0.216135
TTP_min_glcm_DifferenceVariance	0.613881	0.13241		TTP_min_gldm_DependenceVariance	0.630711	0.145413		TTP_min_gldm_LowGrayLevelEmphasis	0.661	0.209619
TTP_min_gldm_SmallDependenceLowGrayLevelEmphasis	0.613817	0.127227		TTP_min_glcm_DifferenceVariance	0.628378	0.141307		TTP_min_firstorder_Variance	0.660333	0.208389
TTP_min_firstorder_Uniformity	0.613185	0.127741		TBR20to40_firstorder_Maximum	0.627867	0.154757		TTP_min_firstorder_MeanAbsoluteDeviation	0.658222	0.212255
TTP_min_glcm_JointEnergy	0.612938	0.128496		TTP_min_gldm_DependenceEntropy	0.6278	0.146086		TTP_min_glcm_SumSquares	0.658111	0.215948
TTP_min_glszm_HighGrayLevelZoneEmphasis	0.609575	0.12716		TTP_min_firstorder_10Percentile	0.626689	0.138747		TBR20to40_firstorder_Minimum	0.651667	0.216667
TTP_min_gldm_SmallDependenceEmphasis	0.609294	0.124319		TTP_min_firstorder_Uniformity	0.626556	0.147305		TBR20to40_glszm_SmallAreaEmphasis	0.650333	0.202672
TBR20to40_glcm_ClusterShade	0.608904	0.119757		TTP_min_gldm_GrayLevelVariance	0.626178	0.145424		TBR5to15_firstorder_Uniformity	0.649111	0.216554
TTP_min_glcm_DifferenceEntropy	0.608188	0.12902		TTP_min_glcm_DifferenceEntropy	0.625333	0.140453		TTP_min_glszm_SmallAreaLowGrayLevelEmphasis	0.648222	0.227424
TTP_min_glszm_LowGrayLevelZoneEmphasis	0.60716	0.128763		TTP_min_firstorder_Variance	0.622378	0.144453		TBR20to40_glcm_JointEnergy	0.648111	0.217983
TBR5to15_glrlm_LongRunHighGrayLevelEmphasis	0.606316	0.109781		TTP_min_firstorder_Entropy	0.619111	0.144099		TBR20to40_gldm_LargeDependenceHighGrayLevelEmphasis	0.645	0.211249
TTP_min_glrlm_GrayLevelVariance	0.604222	0.127784		TTP_min_glrlm_ShortRunHighGrayLevelEmphasis	0.618911	0.149569		TTP_min_glcm_Correlation	0.644778	0.20699
TBR5to15_firstorder_Mean	0.602326	0.114732		TTP_min_glszm_SmallAreaEmphasis	0.6188	0.159739		TBR20to40_firstorder_Skewness	0.643556	0.209828
TTP_min_glcm_InverseVariance	0.601793	0.125696		TTP_min_glrlm_GrayLevelNonUniformityNormalized	0.618267	0.143705		TTP_min_glrlm_LowGrayLevelRunEmphasis	0.642444	0.204546
TTP_min_gldm_DependenceVariance	0.601714	0.123906		TBR20to40_glrlm_ShortRunLowGrayLevelEmphasis	0.617156	0.146525		TBR5to15_glcm_MaximumProbability	0.637889	0.213356
TBR5to15_gldm_LargeDependenceLowGrayLevelEmphasis	0.598469	0.122872		TBR5to15_firstorder_Maximum	0.614956	0.153762		TBR5to15_glrlm_ShortRunHighGrayLevelEmphasis	0.637444	0.22307
TBR5to15_firstorder_RootMeanSquared	0.597906	0.115987		TBR20to40_glszm_SizeZoneNonUniformity	0.613533	0.155674		TTP_min_glrlm_HighGrayLevelRunEmphasis	0.637111	0.207074
TBR5to15_gldm_HighGrayLevelEmphasis	0.596504	0.119395		TTP_min_firstorder_Median	0.613056	0.143132		TBR20to40_firstorder_90Percentile	0.636889	0.236322
TTP_min_glcm_Imc2	0.594701	0.107129		TTP_min_glcm_InverseVariance	0.612511	0.157659		TBR5to15_ngtdm_Contrast	0.633	0.222789
TTP_min_firstorder_Median	0.592857	0.110071		TBR20to40_glcm_ClusterShade	0.600733	0.156053		TTP_min_glrlm_GrayLevelNonUniformityNormalized	0.632778	0.208706
TBR20to40_firstorder_Skewness	0.592212	0.12354		TBR5to15_gldm_LargeDependenceHighGrayLevelEmphasis	0.599178	0.147149		TBR20to40_glcm_JointEntropy	0.630667	0.219709
TBR20to40_gldm_LowGrayLevelEmphasis	0.591442	0.120971		TTP_min_glcm_ClusterProminence	0.597578	0.152039		TTP_min_ngtdm_Contrast	0.630333	0.215819
TBR20to40_gldm_LargeDependenceHighGrayLevelEmphasis	0.590558	0.11574		TTP_min_glszm_GrayLevelVariance	0.597022	0.14705		TTP_min_gldm_HighGrayLevelEmphasis	0.628111	0.209625
TTP_min_glrlm_ShortRunHighGrayLevelEmphasis	0.590005	0.111333		TTP_min_glszm_ZonePercentage	0.596911	0.150039		TBR5to15_glrlm_GrayLevelNonUniformityNormalized	0.627	0.219069
TBR20to40_glrlm_ShortRunLowGrayLevelEmphasis	0.589358	0.120507		TTP_min_glrlm_GrayLevelVariance	0.595933	0.146737		TBR20to40_glszm_SizeZoneNonUniformityNormalized	0.626333	0.211957
TBR5to15_gldm_LowGrayLevelEmphasis	0.589096	0.113926		TBR20to40_glrlm_LowGrayLevelRunEmphasis	0.595778	0.143306		TBR5to15_firstorder_MeanAbsoluteDeviation	0.625222	0.221934
TBR20to40_glrlm_LowGrayLevelRunEmphasis	0.587042	0.120594		TBR20to40_glszm_LowGrayLevelZoneEmphasis	0.593711	0.141177		TTP_min_glrlm_RunLengthNonUniformityNormalized	0.624444	0.215913
TBR20to40_glrlm_LongRunHighGrayLevelEmphasis	0.586035	0.121002		TBR20to40_glszm_SmallAreaLowGrayLevelEmphasis	0.592733	0.156685		TTP_min_firstorder_Mean	0.622	0.215521
TBR5to15_glrlm_LongRunLowGrayLevelEmphasis	0.585516	0.121508		TTP_min_glrlm_LongRunLowGrayLevelEmphasis	0.591978	0.150879		TBR20to40_glrlm_LongRunHighGrayLevelEmphasis	0.621889	0.22095
TBR5to15_glrlm_HighGrayLevelRunEmphasis	0.578198	0.11978		TBR5to15_firstorder_Kurtosis	0.5912	0.158757		TTP_min_glrlm_GrayLevelVariance	0.621667	0.212037
TBR20to40_glrlm_LongRunLowGrayLevelEmphasis	0.577402	0.124133		TTP_min_glszm_LargeAreaEmphasis	0.590933	0.14459		TTP_min_glcm_JointAverage	0.620333	0.211764
TBR20to40_ngtdm_Contrast	0.577373	0.124089		TTP_min_glcm_Imc2	0.586556	0.161048		TTP_min_glcm_SumAverage	0.620333	0.211764
TBR20to40_gldm_LargeDependenceLowGrayLevelEmphasis	0.575699	0.12293		TTP_min_glszm_ZoneVariance	0.586556	0.144348		TBR20to40_gldm_DependenceNonUniformityNormalized	0.62	0.236959
TBR20to40_glcm_JointAverage	0.573891	0.120386		TBR20to40_gldm_LowGrayLevelEmphasis	0.584978	0.146312		TTP_min_gldm_DependenceEntropy	0.619	0.208632
TBR20to40_glcm_SumAverage	0.573891	0.120386		TTP_min_glszm_LargeAreaHighGrayLevelEmphasis	0.582044	0.144713		TTP_min_glrlm_ShortRunEmphasis	0.618333	0.218243
TBR5to15_glrlm_LowGrayLevelRunEmphasis	0.573798	0.114552		TBR20to40_glrlm_LongRunLowGrayLevelEmphasis	0.581867	0.163366		TTP_min_glrlm_ShortRunLowGrayLevelEmphasis	0.617333	0.203893
TBR5to15_glrlm_ShortRunLowGrayLevelEmphasis	0.573195	0.113286		TBR5to15_glszm_SmallAreaHighGrayLevelEmphasis	0.581844	0.153753		TTP_min_glcm_SumEntropy	0.616222	0.217019
TTP_min_gldm_LargeDependenceLowGrayLevelEmphasis	0.572884	0.109131		TBR5to15_ngtdm_Contrast	0.581289	0.147232		TBR20to40_glcm_Idn	0.615667	0.215497
TBR20to40_glszm_SizeZoneNonUniformity	0.572593	0.11767		TBR20to40_gldm_SmallDependenceLowGrayLevelEmphasis	0.581267	0.139617		TTP_min_firstorder_Entropy	0.614111	0.21452
TTP_min_glcm_ClusterShade	0.569511	0.127796		TTP_min_gldm_LargeDependenceLowGrayLevelEmphasis	0.580756	0.155483		TTP_min_firstorder_RootMeanSquared	0.613889	0.214437
TTP_min_glszm_ZonePercentage	0.568988	0.120269		TBR20to40_gldm_LargeDependenceHighGrayLevelEmphasis	0.580489	0.144904		TBR20to40_glszm_SmallAreaHighGrayLevelEmphasis	0.612778	0.220648
TBR20to40_firstorder_Kurtosis	0.568099	0.132109		TBR20to40_glrlm_LongRunHighGrayLevelEmphasis	0.577644	0.147032		TBR20to40_gldm_LowGrayLevelEmphasis	0.611667	0.218022
TBR20to40_glrlm_GrayLevelNonUniformityNormalized	0.565763	0.137992		TBR20to40_gldm_LargeDependenceLowGrayLevelEmphasis	0.577	0.166292		TBR20to40_glcm_ClusterShade	0.610222	0.218198
TBR20to40_glcm_Idn	0.565709	0.120575		TBR5to15_firstorder_Minimum	0.5762	0.157041		TTP_min_glcm_Imc2	0.610111	0.232144
TBR20to40_gldm_GrayLevelVariance	0.564593	0.135279		TBR20to40_glcm_JointAverage	0.576022	0.150325		TTP_min_firstorder_10Percentile	0.609056	0.197803
TBR20to40_firstorder_Uniformity	0.564464	0.139213		TBR20to40_glcm_SumAverage	0.576022	0.150325		TTP_min_glcm_JointEntropy	0.608778	0.220082
TBR20to40_glcm_Autocorrelation	0.564449	0.12242		TBR20to40_glcm_Autocorrelation	0.574889	0.149882		TBR5to15_glcm_Correlation	0.607	0.219212
TTP_min_ngtdm_Complexity	0.564296	0.129941		TBR20to40_firstorder_Skewness	0.5732	0.156401		TBR20to40_glszm_HighGrayLevelZoneEmphasis	0.606556	0.223526
TBR20to40_glrlm_GrayLevelVariance	0.56404	0.134253		TTP_min_ngtdm_Strength	0.572067	0.149833		TTP_min_glcm_Autocorrelation	0.606556	0.210747
TBR20to40_firstorder_MeanAbsoluteDeviation	0.563783	0.135581		TBR20to40_glszm_GrayLevelNonUniformity	0.571544	0.147893		TTP_min_gldm_LargeDependenceHighGrayLevelEmphasis	0.599333	0.220529
TBR20to40_firstorder_RobustMeanAbsoluteDeviation	0.563269	0.137231		TBR5to15_glrlm_LongRunHighGrayLevelEmphasis	0.571044	0.152603		TTP_min_firstorder_Uniformity	0.597889	0.217565
TBR20to40_firstorder_Minimum	0.562257	0.118551		TBR5to15_glcm_MCC	0.569222	0.156043		TBR20to40_gldm_DependenceVariance	0.597444	0.237545
TBR20to40_firstorder_Variance	0.561847	0.13577		TBR20to40_gldm_HighGrayLevelEmphasis	0.569133	0.151402		TBR20to40_glszm_SmallAreaLowGrayLevelEmphasis	0.597222	0.206832
TTP_min_glcm_Correlation	0.561709	0.124203		TTP_min_glszm_SizeZoneNonUniformityNormalized	0.567356	0.16068		TTP_min_glcm_InverseVariance	0.597111	0.22321
TBR20to40_firstorder_Entropy	0.558593	0.137259		TTP_min_glcm_Imc1	0.566822	0.145869		TBR5to15_firstorder_Entropy	0.596	0.222222
TTP_min_glszm_LargeAreaEmphasis	0.558494	0.111643		TBR20to40_glrlm_HighGrayLevelRunEmphasis	0.566133	0.148596		TBR20to40_gldm_DependenceEntropy	0.596	0.212699
TBR5to15_firstorder_10Percentile	0.558257	0.121018		TBR5to15_firstorder_10Percentile	0.565756	0.151334		TBR5to15_glcm_Imc2	0.595889	0.220549
TTP_min_glszm_LargeAreaHighGrayLevelEmphasis	0.556336	0.114358		TTP_min_ngtdm_Complexity	0.563222	0.149766		TTP_min_firstorder_InterquartileRange	0.595056	0.219369
TBR20to40_firstorder_InterquartileRange	0.55559	0.137411		TBR5to15_ngtdm_Complexity	0.562933	0.159287		TTP_min_glrlm_RunPercentage	0.594889	0.223695
TBR5to15_glszm_LargeAreaLowGrayLevelEmphasis	0.555546	0.118229		TBR5to15_firstorder_Uniformity	0.560467	0.152727		TTP_min_glcm_Id	0.594444	0.224089
TTP_min_glszm_ZoneVariance	0.555225	0.111825		TBR5to15_firstorder_RobustMeanAbsoluteDeviation	0.559933	0.1545		TTP_min_glcm_Contrast	0.593778	0.222754
TTP_min_glrlm_LongRunLowGrayLevelEmphasis	0.554519	0.109936		TTP_min_glszm_LargeAreaLowGrayLevelEmphasis	0.559756	0.149963		TBR20to40_glcm_Imc1	0.593444	0.227655
TTP_min_glszm_GrayLevelVariance	0.553733	0.130463		TBR20to40_glrlm_ShortRunHighGrayLevelEmphasis	0.5596	0.154348		TTP_min_glcm_Idmn	0.593444	0.224405
TBR20to40_gldm_HighGrayLevelEmphasis	0.552365	0.121972		TBR5to15_firstorder_InterquartileRange	0.558178	0.1549		TBR5to15_glcm_JointEnergy	0.593	0.224823
TBR5to15_glrlm_ShortRunHighGrayLevelEmphasis	0.552143	0.122822		TBR20to40_gldm_SmallDependenceEmphasis	0.558111	0.16018		TTP_min_glcm_DifferenceVariance	0.592556	0.223865
TBR20to40_glcm_SumEntropy	0.551916	0.136571		TBR5to15_glcm_MaximumProbability	0.557622	0.152741		TTP_min_glcm_Idn	0.592333	0.2269
TBR20to40_glcm_Idmn	0.551491	0.120781		TBR5to15_glszm_SmallAreaEmphasis	0.557	0.164159		TBR5to15_glcm_SumEntropy	0.592111	0.219835
TBR20to40_glszm_SmallAreaHighGrayLevelEmphasis	0.551111	0.124213		TTP_min_glszm_GrayLevelNonUniformityNormalized	0.556578	0.150633		TTP_min_gldm_LargeDependenceEmphasis	0.591667	0.222503
TBR20to40_glcm_SumSquares	0.548548	0.137863		TBR5to15_glcm_Autocorrelation	0.556133	0.161993		TTP_min_glcm_Idm	0.591333	0.224415
TBR20to40_glcm_ClusterProminence	0.548123	0.130286		TBR5to15_firstorder_MeanAbsoluteDeviation	0.554511	0.152688		TTP_min_glcm_DifferenceEntropy	0.591	0.227832
TBR20to40_glrlm_HighGrayLevelRunEmphasis	0.547635	0.122966		TBR20to40_glszm_LargeAreaHighGrayLevelEmphasis	0.554467	0.139051		TBR5to15_glcm_Idn	0.590778	0.229902
TBR20to40_glcm_ClusterTendency	0.547457	0.137595		TBR5to15_glrlm_RunLengthNonUniformityNormalized	0.554378	0.160317		TTP_min_glcm_DifferenceAverage	0.590333	0.228637
TBR20to40_firstorder_Maximum	0.546435	0.128361		TBR20to40_gldm_DependenceNonUniformityNormalized	0.554378	0.147564		TBR5to15_gldm_DependenceEntropy	0.588444	0.202084
TBR5to15_glszm_GrayLevelNonUniformityNormalized	0.545988	0.125502		TTP_min_ngtdm_Busyness	0.553911	0.153452		TTP_min_glrlm_LongRunHighGrayLevelEmphasis	0.588222	0.225478
TBR5to15_glszm_SmallAreaHighGrayLevelEmphasis	0.545437	0.138242		TTP_min_gldm_SmallDependenceHighGrayLevelEmphasis	0.553422	0.161831		TBR20to40_gldm_LargeDependenceLowGrayLevelEmphasis	0.588	0.226029
TBR5to15_firstorder_90Percentile	0.544479	0.124903		TBR5to15_ngtdm_Strength	0.553178	0.158131		TBR5to15_glcm_ClusterShade	0.587667	0.222451
TTP_min_glcm_MCC	0.544415	0.11463		TBR5to15_glcm_JointAverage	0.551933	0.163176		TTP_min_glcm_MaximumProbability	0.587556	0.222806
TTP_min_gldm_SmallDependenceHighGrayLevelEmphasis	0.544074	0.117554		TBR5to15_glcm_SumAverage	0.551933	0.163176		TTP_min_firstorder_Kurtosis	0.587111	0.220978
TTP_min_glcm_Imc1	0.543447	0.111909		TBR5to15_glcm_Imc2	0.551556	0.161772		TTP_min_firstorder_RobustMeanAbsoluteDeviation	0.586778	0.216347
TBR5to15_firstorder_Maximum	0.542706	0.127198		TBR5to15_firstorder_90Percentile	0.550933	0.152358		TBR20to40_firstorder_Maximum	0.585667	0.219632
TBR5to15_glszm_LowGrayLevelZoneEmphasis	0.542356	0.124095		TTP_min_gldm_GrayLevelNonUniformity	0.549511	0.147953		TBR20to40_glcm_InverseVariance	0.583778	0.238216
TBR20to40_glcm_JointEnergy	0.54157	0.138942		TBR5to15_glcm_ClusterProminence	0.548444	0.157998		TBR5to15_ngtdm_Busyness	0.581778	0.230681
TBR5to15_glcm_MCC	0.541556	0.123406		TBR20to40_glszm_ZonePercentage	0.548378	0.159072		TTP_min_gldm_LargeDependenceLowGrayLevelEmphasis	0.581556	0.220108
TBR20to40_glcm_InverseVariance	0.540775	0.131602		TBR5to15_glcm_SumSquares	0.548333	0.154578		TBR5to15_glszm_GrayLevelNonUniformityNormalized	0.581111	0.226871
TBR20to40_gldm_SmallDependenceLowGrayLevelEmphasis	0.540588	0.114966		TBR5to15_glcm_Imc1	0.548044	0.163325		TBR5to15_glszm_LargeAreaLowGrayLevelEmphasis	0.580667	0.226703
TBR20to40_firstorder_Mean	0.540183	0.122974		TBR5to15_glcm_ClusterTendency	0.545556	0.1577		TTP_min_glcm_JointEnergy	0.580222	0.221393
TBR20to40_firstorder_RootMeanSquared	0.539778	0.123204		TBR5to15_glrlm_ShortRunEmphasis	0.545356	0.162802		TBR5to15_glcm_ClusterTendency	0.579778	0.225256
TBR5to15_gldm_DependenceNonUniformityNormalized	0.538948	0.121172		TBR20to40_glcm_Idmn	0.545244	0.148766		TBR5to15_firstorder_Skewness	0.579222	0.232694
TTP_min_glszm_GrayLevelNonUniformityNormalized	0.538612	0.130912		TTP_min_glrlm_RunLengthNonUniformity	0.545067	0.150762		TBR20to40_glrlm_LowGrayLevelRunEmphasis	0.579222	0.226429
TBR20to40_glrlm_ShortRunHighGrayLevelEmphasis	0.537931	0.127038		TBR5to15_gldm_LargeDependenceEmphasis	0.543933	0.159626		TBR5to15_gldm_DependenceNonUniformityNormalized	0.579	0.233061
TBR20to40_glcm_MaximumProbability	0.537872	0.139991		TBR5to15_glcm_Idn	0.542822	0.147997		TBR20to40_glrlm_LongRunLowGrayLevelEmphasis	0.577889	0.23123
TTP_min_ngtdm_Strength	0.537723	0.119697		TTP_min_gldm_DependenceNonUniformityNormalized	0.542778	0.156611		TBR5to15_gldm_SmallDependenceHighGrayLevelEmphasis	0.576222	0.239506
TBR20to40_glszm_LargeAreaHighGrayLevelEmphasis	0.537659	0.113132		TBR20to40_ngtdm_Strength	0.542556	0.153839		TTP_min_glszm_ZoneEntropy	0.574889	0.2254
TTP_min_glrlm_RunLengthNonUniformity	0.537462	0.119918		TBR5to15_gldm_HighGrayLevelEmphasis	0.541911	0.163843		TBR20to40_glcm_Idmn	0.573778	0.209087
TBR20to40_ngtdm_Strength	0.537407	0.117381		TBR20to40_firstorder_Energy	0.541844	0.152494		TTP_min_firstorder_Skewness	0.572778	0.220765
TBR20to40_glcm_Idm	0.537314	0.132188		TBR20to40_firstorder_TotalEnergy	0.541844	0.152494		TTP_min_gldm_SmallDependenceHighGrayLevelEmphasis	0.572	0.224299
TBR20to40_glcm_Id	0.5368	0.131485		TBR5to15_glcm_Correlation	0.541578	0.163439		TBR5to15_glcm_Idmn	0.570444	0.217393
TBR20to40_glcm_JointEntropy	0.536301	0.137361		TBR20to40_glrlm_RunVariance	0.541489	0.152955		TBR20to40_glszm_ZoneEntropy	0.569222	0.203203
TBR20to40_glcm_DifferenceAverage	0.536148	0.132638		TBR20to40_glszm_GrayLevelNonUniformityNormalized	0.541111	0.167812		TTP_min_glrlm_LongRunEmphasis	0.568333	0.225518
TTP_min_glszm_LargeAreaLowGrayLevelEmphasis	0.535906	0.11168		TBR20to40_glcm_MaximumProbability	0.539733	0.15831		TTP_min_glrlm_RunVariance	0.567444	0.224579
TBR5to15_ngtdm_Busyness	0.535457	0.126421		TTP_min_glszm_SizeZoneNonUniformity	0.539633	0.149968		TBR5to15_firstorder_Variance	0.567111	0.228567
TTP_min_gldm_GrayLevelNonUniformity	0.535244	0.114889		TBR20to40_glszm_HighGrayLevelZoneEmphasis	0.539289	0.153548		TBR5to15_glcm_SumSquares	0.567111	0.225905
TBR5to15_gldm_SmallDependenceLowGrayLevelEmphasis	0.53524	0.106439		TBR20to40_gldm_DependenceVariance	0.539267	0.152841		TTP_min_gldm_DependenceNonUniformityNormalized	0.567	0.214753
TTP_min_glszm_SmallAreaLowGrayLevelEmphasis	0.53441	0.124726		TBR5to15_gldm_SmallDependenceEmphasis	0.539244	0.157083		TBR20to40_glcm_Id	0.566889	0.233124
TBR5to15_gldm_DependenceVariance	0.533244	0.12162		TBR5to15_firstorder_Variance	0.539089	0.158469		TTP_min_glcm_MCC	0.566889	0.235482
TBR20to40_glszm_LargeAreaLowGrayLevelEmphasis	0.533205	0.117773		TBR5to15_glcm_SumEntropy	0.538644	0.155041		TBR5to15_firstorder_Energy	0.565111	0.207099
TBR20to40_ngtdm_Busyness	0.532933	0.116068		TBR5to15_gldm_SmallDependenceHighGrayLevelEmphasis	0.5386	0.164746		TBR5to15_firstorder_TotalEnergy	0.565111	0.207099
TBR20to40_glcm_Imc2	0.532474	0.126325		TBR20to40_glcm_MCC	0.5384	0.154734		TBR20to40_glcm_DifferenceAverage	0.562889	0.231784
TBR20to40_firstorder_10Percentile	0.531802	0.133243		TBR5to15_glszm_HighGrayLevelZoneEmphasis	0.538378	0.16625		TBR5to15_glrlm_RunEntropy	0.562667	0.222275
TBR20to40_firstorder_90Percentile	0.531635	0.12417		TBR5to15_gldm_GrayLevelVariance	0.538244	0.157183		TBR5to15_gldm_GrayLevelVariance	0.562556	0.227161
TBR5to15_glrlm_RunLengthNonUniformityNormalized	0.53043	0.121784		TBR20to40_ngtdm_Busyness	0.537778	0.157019		TBR5to15_glszm_ZonePercentage	0.562111	0.237535
TBR20to40_glszm_GrayLevelNonUniformityNormalized	0.530141	0.132587		TBR5to15_glszm_LargeAreaLowGrayLevelEmphasis	0.535978	0.156795		TBR20to40_glszm_ZonePercentage	0.561889	0.233055
TBR5to15_glszm_SmallAreaLowGrayLevelEmphasis	0.529965	0.119451		TBR5to15_firstorder_Range	0.535933	0.154607		TBR20to40_glcm_Idm	0.561111	0.232472
TTP_min_ngtdm_Busyness	0.529299	0.119315		TBR5to15_glrlm_RunPercentage	0.535267	0.155721		TBR20to40_glrlm_RunEntropy	0.560333	0.211196
TBR20to40_glszm_LowGrayLevelZoneEmphasis	0.528183	0.12127		TBR5to15_firstorder_Entropy	0.5352	0.15618		TBR20to40_glcm_JointAverage	0.56	0.225501
TBR20to40_glszm_GrayLevelNonUniformity	0.527519	0.117951		TBR5to15_glrlm_GrayLevelNonUniformityNormalized	0.5348	0.155073		TBR20to40_glcm_SumAverage	0.56	0.225501
TBR20to40_glrlm_ShortRunEmphasis	0.526637	0.12534		TTP_min_glszm_SmallAreaHighGrayLevelEmphasis	0.534667	0.164632		TBR5to15_glcm_JointEntropy	0.559667	0.226878
TBR5to15_gldm_LargeDependenceEmphasis	0.52562	0.121629		TBR5to15_glcm_Idmn	0.533978	0.14425		TBR20to40_glszm_GrayLevelVariance	0.559444	0.220746
TBR20to40_gldm_SmallDependenceEmphasis	0.52557	0.118282		TBR20to40_glcm_Idn	0.533622	0.153835		TBR5to15_glszm_GrayLevelVariance	0.558444	0.217231
TBR5to15_glrlm_ShortRunEmphasis	0.525447	0.124207		TBR20to40_glcm_Correlation	0.531978	0.163293		TTP_min_glszm_GrayLevelVariance	0.558333	0.224877
TBR20to40_glcm_Correlation	0.525338	0.123898		TBR20to40_glszm_LargeAreaLowGrayLevelEmphasis	0.531933	0.15833		TBR5to15_glcm_MCC	0.558	0.224503
TBR5to15_glcm_ClusterProminence	0.52517	0.123575		TBR5to15_glszm_ZoneVariance	0.531489	0.152791		TBR20to40_glrlm_ShortRunLowGrayLevelEmphasis	0.557222	0.225901
TBR20to40_firstorder_Median	0.524588	0.122855		TTP_min_firstorder_Range	0.531133	0.134915		TTP_min_glrlm_ShortRunHighGrayLevelEmphasis	0.556889	0.210492
TTP_min_glszm_ZoneEntropy	0.524153	0.119515		TBR20to40_ngtdm_Complexity	0.531044	0.159653		TBR20to40_glcm_DifferenceVariance	0.556444	0.230938
TTP_min_firstorder_Energy	0.523427	0.113469		TBR5to15_glrlm_GrayLevelVariance	0.530889	0.159539		TTP_min_glszm_LargeAreaHighGrayLevelEmphasis	0.555667	0.218885
TTP_min_firstorder_TotalEnergy	0.523427	0.113469		TTP_min_glcm_MCC	0.530422	0.150343		TBR20to40_glcm_DifferenceEntropy	0.553556	0.232291
TBR5to15_glszm_ZoneVariance	0.523393	0.111956		TBR5to15_glcm_JointEnergy	0.530267	0.155153		TBR20to40_glcm_Autocorrelation	0.552889	0.224445
TBR5to15_glszm_SmallAreaEmphasis	0.522864	0.131295		TBR20to40_ngtdm_Contrast	0.529311	0.142773		TBR20to40_glrlm_LongRunEmphasis	0.552444	0.238597
TBR5to15_glszm_ZonePercentage	0.522533	0.113174		TTP_min_glcm_Correlation	0.528289	0.165768		TTP_min_glszm_LargeAreaEmphasis	0.552444	0.218841
TBR5to15_glszm_HighGrayLevelZoneEmphasis	0.522454	0.128436		TBR20to40_firstorder_Kurtosis	0.527978	0.16258		TTP_min_glszm_ZoneVariance	0.552444	0.218841
TBR20to40_glcm_Contrast	0.521486	0.129966		TBR20to40_glcm_Imc1	0.526067	0.158532		TBR20to40_glrlm_ShortRunEmphasis	0.552333	0.239763
TBR5to15_glrlm_RunPercentage	0.521269	0.120333		TBR5to15_glszm_LowGrayLevelZoneEmphasis	0.525844	0.170527		TBR5to15_firstorder_Maximum	0.551444	0.225158
TBR5to15_glszm_LargeAreaEmphasis	0.521259	0.109797		TBR20to40_glcm_JointEnergy	0.5258	0.159466		TTP_min_gldm_DependenceVariance	0.551333	0.221709
TBR20to40_glcm_DifferenceVariance	0.521052	0.1258		TBR5to15_glrlm_LongRunEmphasis	0.5256	0.154406		TBR5to15_glszm_SmallAreaHighGrayLevelEmphasis	0.550111	0.222648
TBR5to15_glcm_Imc2	0.520336	0.12618		TTP_min_firstorder_Energy	0.524644	0.144428		TBR20to40_glcm_Contrast	0.549889	0.233522
TBR20to40_glcm_DifferenceEntropy	0.520114	0.128533		TTP_min_firstorder_TotalEnergy	0.524644	0.144428		TTP_min_glrlm_RunLengthNonUniformity	0.549667	0.219805
TBR20to40_glrlm_RunLengthNonUniformityNormalized	0.51998	0.126505		TBR5to15_glszm_SmallAreaLowGrayLevelEmphasis	0.524489	0.153118		TBR20to40_firstorder_Range	0.549222	0.223483
TBR5to15_firstorder_InterquartileRange	0.51961	0.135535		TBR5to15_glrlm_HighGrayLevelRunEmphasis	0.524178	0.166569		TBR5to15_ngtdm_Complexity	0.548333	0.218723
TBR5to15_glcm_Imc1	0.519595	0.123416		TBR5to15_glszm_GrayLevelVariance	0.524067	0.149869		TTP_min_gldm_GrayLevelNonUniformity	0.547667	0.219826
TBR20to40_glszm_SmallAreaLowGrayLevelEmphasis	0.518825	0.129947		TBR5to15_glszm_LargeAreaEmphasis	0.523711	0.151738		TTP_min_firstorder_Median	0.547278	0.18891
TBR20to40_ngtdm_Complexity	0.518775	0.128014		TTP_min_glrlm_GrayLevelNonUniformity	0.523444	0.152895		TTP_min_glrlm_RunEntropy	0.546222	0.222665
TBR5to15_firstorder_RobustMeanAbsoluteDeviation	0.518489	0.134006		TBR5to15_glrlm_RunEntropy	0.523311	0.156874		TBR5to15_glrlm_GrayLevelVariance	0.546111	0.230633
TBR5to15_glrlm_GrayLevelNonUniformityNormalized	0.517511	0.129825		TBR5to15_glszm_GrayLevelNonUniformityNormalized	0.523311	0.154743		TBR20to40_gldm_LargeDependenceEmphasis	0.546111	0.239728
TBR5to15_glcm_InverseVariance	0.516998	0.126196		TBR20to40_glcm_ClusterTendency	0.523222	0.161055		TBR20to40_glrlm_RunLengthNonUniformityNormalized	0.545667	0.239427
TTP_min_glrlm_RunEntropy	0.516805	0.118173		TBR5to15_gldm_SmallDependenceLowGrayLevelEmphasis	0.5232	0.152522		TBR20to40_glrlm_RunLengthNonUniformity	0.545444	0.211738
TBR20to40_gldm_DependenceNonUniformityNormalized	0.515565	0.139903		TBR5to15_glrlm_LowGrayLevelRunEmphasis	0.521844	0.172187		TBR5to15_glcm_InverseVariance	0.545333	0.237984
TTP_min_glszm_SmallAreaEmphasis	0.515057	0.117023		TTP_min_firstorder_Minimum	0.521433	0.12456		TBR20to40_glszm_GrayLevelNonUniformity	0.544556	0.205554
TTP_min_glszm_SizeZoneNonUniformityNormalized	0.515027	0.118117		TBR5to15_glcm_JointEntropy	0.520867	0.156412		TBR5to15_glszm_ZoneEntropy	0.543778	0.20887
TTP_min_glrlm_GrayLevelNonUniformity	0.514859	0.114075		TBR5to15_gldm_DependenceVariance	0.520356	0.161092		TTP_min_ngtdm_Complexity	0.543333	0.227992
TBR5to15_glcm_Idn	0.514741	0.118247		TBR5to15_gldm_DependenceNonUniformityNormalized	0.520133	0.162089		TBR5to15_ngtdm_Strength	0.543111	0.236316
TBR5to15_firstorder_Energy	0.514533	0.117403		TBR5to15_glszm_SizeZoneNonUniformityNormalized	0.519378	0.166096		TBR5to15_glcm_Imc1	0.542333	0.236345
TBR5to15_firstorder_TotalEnergy	0.514533	0.117403		TBR20to40_glcm_Imc2	0.519333	0.162365		TBR20to40_glrlm_RunPercentage	0.541778	0.240373
TBR5to15_glrlm_LongRunEmphasis	0.514049	0.120264		TBR20to40_glcm_SumSquares	0.519067	0.157296		TBR5to15_glszm_SmallAreaEmphasis	0.541	0.214738
TBR20to40_glszm_ZoneEntropy	0.513467	0.123691		TBR20to40_firstorder_InterquartileRange	0.5186	0.159813		TBR5to15_gldm_DependenceVariance	0.540556	0.232632
TBR20to40_glszm_GrayLevelVariance	0.513378	0.128687		TBR5to15_firstorder_Mean	0.518511	0.155399		TTP_min_ngtdm_Strength	0.540222	0.21482
TTP_min_glszm_SmallAreaHighGrayLevelEmphasis	0.512741	0.129519		TBR5to15_ngtdm_Busyness	0.518311	0.160921		TTP_min_gldm_SmallDependenceEmphasis	0.540222	0.23162
TBR5to15_glrlm_RunEntropy	0.512548	0.118551		TBR20to40_glcm_DifferenceAverage	0.517911	0.164688		TBR20to40_gldm_DependenceNonUniformity	0.538444	0.212765
TBR5to15_gldm_SmallDependenceEmphasis	0.512435	0.12429		TBR5to15_firstorder_Median	0.517533	0.152349		TTP_min_glszm_ZonePercentage	0.538222	0.228324
TBR5to15_firstorder_Range	0.51241	0.12798		TBR20to40_glcm_InverseVariance	0.517444	0.159251		TTP_min_glszm_SizeZoneNonUniformity	0.537889	0.211359
TBR20to40_glrlm_RunLengthNonUniformity	0.51203	0.116295		TBR5to15_firstorder_Energy	0.517289	0.152632		TBR20to40_glszm_LargeAreaLowGrayLevelEmphasis	0.537444	0.231918
TBR5to15_glrlm_RunVariance	0.51161	0.119215		TBR5to15_firstorder_TotalEnergy	0.517289	0.152632		TBR20to40_gldm_GrayLevelNonUniformity	0.537222	0.223497
TBR5to15_glszm_SizeZoneNonUniformity	0.5114	0.133103		TBR20to40_glcm_Id	0.517178	0.164039		TBR20to40_glrlm_RunVariance	0.537222	0.239972
TBR5to15_glcm_Contrast	0.511284	0.127583		TBR20to40_glcm_Idm	0.517067	0.164214		TBR5to15_glszm_SizeZoneNonUniformityNormalized	0.536111	0.230622
TBR5to15_glcm_Correlation	0.5112	0.126001		TBR5to15_gldm_LargeDependenceLowGrayLevelEmphasis	0.516956	0.172918		TBR5to15_firstorder_Range	0.535778	0.221201
TBR5to15_glszm_ZoneEntropy	0.511178	0.125859		TBR20to40_glszm_ZoneEntropy	0.516944	0.150213		TBR5to15_glszm_SizeZoneNonUniformity	0.534111	0.213539
TBR20to40_glcm_MCC	0.510993	0.129857		TBR20to40_glcm_SumEntropy	0.516689	0.158904		TBR20to40_glszm_SizeZoneNonUniformity	0.533222	0.208547
TBR20to40_gldm_LargeDependenceEmphasis	0.510889	0.127994		TBR20to40_glcm_ClusterProminence	0.516289	0.155625		TTP_min_glrlm_LongRunLowGrayLevelEmphasis	0.532889	0.223659
TBR5to15_glcm_Id	0.510435	0.129063		TBR20to40_gldm_LargeDependenceEmphasis	0.515756	0.160915		TBR20to40_firstorder_Energy	0.532667	0.210425
TBR20to40_gldm_DependenceVariance	0.510415	0.136641		TBR20to40_ngtdm_Coarseness	0.515089	0.146864		TBR20to40_firstorder_TotalEnergy	0.532667	0.210425
TBR20to40_glrlm_RunVariance	0.510296	0.126058		TBR20to40_firstorder_Range	0.514422	0.162213		TBR20to40_glszm_LargeAreaHighGrayLevelEmphasis	0.532556	0.224362
TBR20to40_glrlm_RunPercentage	0.510257	0.126227		TTP_min_glszm_GrayLevelNonUniformity	0.513756	0.154809		TBR5to15_gldm_DependenceNonUniformity	0.532444	0.213358
TBR5to15_gldm_DependenceNonUniformity	0.510044	0.117109		TBR20to40_glrlm_LongRunEmphasis	0.513644	0.157243		TTP_min_glszm_LargeAreaLowGrayLevelEmphasis	0.530889	0.218192
TBR5to15_ngtdm_Complexity	0.509817	0.1274		TTP_min_glrlm_RunEntropy	0.513578	0.152478		TBR20to40_glszm_LowGrayLevelZoneEmphasis	0.530778	0.222223
TBR20to40_gldm_DependenceEntropy	0.509798	0.121579		TBR5to15_glcm_DifferenceEntropy	0.513022	0.15536		TTP_min_glszm_SmallAreaHighGrayLevelEmphasis	0.530222	0.228103
TBR5to15_glcm_DifferenceEntropy	0.509052	0.128145		TTP_min_ngtdm_Coarseness	0.513	0.151666		TTP_min_firstorder_Energy	0.528	0.223206
TBR5to15_glszm_GrayLevelVariance	0.50899	0.122139		TBR5to15_glszm_GrayLevelNonUniformity	0.512689	0.153712		TTP_min_firstorder_TotalEnergy	0.528	0.223206
TBR5to15_glcm_Idm	0.508953	0.129891		TTP_min_glszm_ZoneEntropy	0.512622	0.14948		TBR5to15_glszm_SmallAreaLowGrayLevelEmphasis	0.527778	0.220927
TBR20to40_glrlm_LongRunEmphasis	0.50882	0.12649		TBR5to15_ngtdm_Coarseness	0.512356	0.148938		TBR5to15_gldm_SmallDependenceEmphasis	0.527444	0.242473
TBR5to15_firstorder_Kurtosis	0.5088	0.122518		TBR5to15_glcm_Id	0.512111	0.160302		TTP_min_firstorder_Range	0.527056	0.101806
TBR20to40_firstorder_Energy	0.508667	0.117554		TBR5to15_gldm_LowGrayLevelEmphasis	0.512044	0.168625		TTP_min_gldm_DependenceNonUniformity	0.527	0.213139
TBR20to40_firstorder_TotalEnergy	0.508667	0.117554		TBR20to40_firstorder_RobustMeanAbsoluteDeviation	0.511889	0.161641		TTP_min_gldm_SmallDependenceLowGrayLevelEmphasis	0.525667	0.226634
TBR20to40_glszm_ZonePercentage	0.508178	0.113428		TTP_min_glcm_ClusterShade	0.511889	0.16088		TBR5to15_glszm_LargeAreaHighGrayLevelEmphasis	0.525556	0.229091
TBR5to15_firstorder_Uniformity	0.508109	0.130375		TBR5to15_firstorder_RootMeanSquared	0.511444	0.150033		TBR5to15_gldm_SmallDependenceLowGrayLevelEmphasis	0.524889	0.233857
TBR5to15_gldm_SmallDependenceHighGrayLevelEmphasis	0.50799	0.136561		TBR20to40_glrlm_GrayLevelVariance	0.510533	0.16038		TBR5to15_glszm_GrayLevelNonUniformity	0.524222	0.216053
TBR5to15_glcm_DifferenceAverage	0.507985	0.128511		TBR5to15_glrlm_RunVariance	0.5104	0.15061		TBR20to40_gldm_HighGrayLevelEmphasis	0.523778	0.22705
TTP_min_firstorder_Range	0.507867	0.0989073		TBR5to15_glrlm_RunLengthNonUniformity	0.510356	0.151091		TTP_min_firstorder_Minimum	0.523722	0.143683
TBR5to15_glszm_LargeAreaHighGrayLevelEmphasis	0.507793	0.112503		TBR5to15_glcm_Idm	0.510244	0.158324		TBR20to40_gldm_SmallDependenceLowGrayLevelEmphasis	0.520333	0.22349
TTP_min_glszm_SizeZoneNonUniformity	0.507642	0.119413		TBR20to40_glrlm_RunEntropy	0.509844	0.158902		TTP_min_ngtdm_Busyness	0.520222	0.217346
TBR20to40_gldm_DependenceNonUniformity	0.50762	0.114813		TBR5to15_gldm_GrayLevelNonUniformity	0.509222	0.148155		TBR5to15_glrlm_RunLengthNonUniformity	0.519667	0.209804
TBR20to40_glszm_HighGrayLevelZoneEmphasis	0.507405	0.127912		TBR5to15_glszm_ZonePercentage	0.509133	0.157998		TBR5to15_glcm_ClusterProminence	0.519444	0.232608
TBR20to40_glszm_LargeAreaEmphasis	0.507106	0.112564		TBR20to40_firstorder_Uniformity	0.508933	0.159336		TBR5to15_glcm_Id	0.518333	0.234824
TBR5to15_glcm_Idmn	0.507096	0.119521		TBR5to15_glcm_Contrast	0.508822	0.157118		TBR5to15_glcm_Idm	0.518333	0.234824
TBR5to15_ngtdm_Coarseness	0.507032	0.11582		TBR5to15_glcm_InverseVariance	0.508756	0.163565		TBR5to15_glcm_DifferenceVariance	0.517	0.238251
TBR20to40_glszm_ZoneVariance	0.506923	0.112764		TBR5to15_glszm_LargeAreaHighGrayLevelEmphasis	0.508689	0.149554		TBR5to15_glcm_DifferenceEntropy	0.516778	0.236811
TBR5to15_glrlm_GrayLevelVariance	0.506691	0.126789		TBR20to40_glszm_SmallAreaHighGrayLevelEmphasis	0.508689	0.165715		TBR20to40_ngtdm_Busyness	0.514889	0.231675
TBR5to15_glcm_DifferenceVariance	0.506652	0.127978		TBR20to40_gldm_SmallDependenceHighGrayLevelEmphasis	0.508667	0.170384		TBR5to15_glrlm_RunVariance	0.514667	0.236645
TBR20to40_glcm_Imc1	0.506198	0.12694		TBR20to40_glszm_GrayLevelVariance	0.508622	0.158212		TBR20to40_glrlm_ShortRunHighGrayLevelEmphasis	0.513889	0.225699
TBR5to15_firstorder_MeanAbsoluteDeviation	0.506109	0.131114		TBR5to15_glcm_DifferenceVariance	0.508533	0.155589		TBR20to40_glrlm_GrayLevelNonUniformity	0.513444	0.222197
TBR5to15_glszm_SizeZoneNonUniformityNormalized	0.505696	0.121542		TBR5to15_glrlm_GrayLevelNonUniformity	0.508378	0.149943		TBR20to40_glszm_ZoneVariance	0.512222	0.229126
TBR5to15_glrlm_GrayLevelNonUniformity	0.505546	0.114886		TBR20to40_glcm_JointEntropy	0.508044	0.158029		TBR20to40_ngtdm_Coarseness	0.511556	0.218911
TBR5to15_firstorder_Entropy	0.505521	0.129425		TBR20to40_glrlm_RunPercentage	0.507911	0.16301		TBR20to40_ngtdm_Strength	0.511333	0.231876
TTP_min_glszm_GrayLevelNonUniformity	0.505511	0.117563		TBR5to15_glrlm_ShortRunLowGrayLevelEmphasis	0.507756	0.166272		TBR20to40_ngtdm_Complexity	0.510667	0.229231
TBR5to15_glrlm_RunLengthNonUniformity	0.505383	0.118457		TBR20to40_gldm_GrayLevelNonUniformity	0.507244	0.145065		TTP_min_glszm_LowGrayLevelZoneEmphasis	0.509444	0.223193
TBR5to15_ngtdm_Strength	0.505264	0.122062		TBR5to15_glcm_DifferenceAverage	0.506244	0.158388		TBR5to15_glrlm_RunLengthNonUniformityNormalized	0.509333	0.236119
TBR5to15_glcm_SumSquares	0.505175	0.128488		TBR5to15_glszm_SizeZoneNonUniformity	0.506111	0.154205		TBR20to40_glrlm_HighGrayLevelRunEmphasis	0.509222	0.227286
TBR5to15_glszm_GrayLevelNonUniformity	0.504951	0.124267		TBR20to40_firstorder_Entropy	0.505667	0.159476		TBR5to15_gldm_GrayLevelNonUniformity	0.509111	0.222757
TBR5to15_gldm_GrayLevelNonUniformity	0.504711	0.113869		TBR5to15_glszm_ZoneEntropy	0.505633	0.155492		TBR20to40_glszm_LargeAreaEmphasis	0.509111	0.229123
TBR5to15_glcm_JointEntropy	0.50441	0.130886		TBR5to15_glrlm_ShortRunHighGrayLevelEmphasis	0.505311	0.16837		TTP_min_glrlm_GrayLevelNonUniformity	0.508667	0.224376
TBR20to40_ngtdm_Coarseness	0.504281	0.116203		TBR20to40_glszm_ZoneVariance	0.505089	0.146116		TTP_min_glszm_HighGrayLevelZoneEmphasis	0.508	0.231869
TTP_min_ngtdm_Coarseness	0.504005	0.116581		TBR20to40_glrlm_RunLengthNonUniformity	0.504933	0.150792		TBR5to15_glszm_HighGrayLevelZoneEmphasis	0.507444	0.221004
TBR20to40_glrlm_GrayLevelNonUniformity	0.503758	0.114683		TTP_min_gldm_DependenceNonUniformity	0.504667	0.147471		TBR5to15_glrlm_ShortRunEmphasis	0.507111	0.237201
TBR5to15_glcm_MaximumProbability	0.503659	0.13076		TBR20to40_glrlm_GrayLevelNonUniformity	0.5044	0.147087		TBR5to15_glcm_Contrast	0.506778	0.235402
TBR5to15_glcm_ClusterTendency	0.503506	0.129347		TBR5to15_gldm_DependenceNonUniformity	0.5044	0.150326		TBR20to40_gldm_SmallDependenceEmphasis	0.506333	0.237489
TBR5to15_glcm_JointEnergy	0.502825	0.13078		TBR20to40_glszm_LargeAreaEmphasis	0.504178	0.146771		TTP_min_ngtdm_Coarseness	0.505889	0.221553
TBR20to40_gldm_SmallDependenceHighGrayLevelEmphasis	0.502227	0.129164		TBR20to40_gldm_DependenceEntropy	0.503933	0.166578		TBR5to15_glszm_LargeAreaEmphasis	0.505778	0.226236
TBR5to15_ngtdm_Contrast	0.501891	0.122674		TBR5to15_gldm_DependenceEntropy	0.503778	0.161544		TBR20to40_glszm_GrayLevelNonUniformityNormalized	0.505556	0.219047
TTP_min_gldm_DependenceNonUniformity	0.501585	0.114919		TBR20to40_gldm_DependenceNonUniformity	0.503222	0.151453		TTP_min_glszm_GrayLevelNonUniformity	0.505444	0.216406
TBR5to15_firstorder_Variance	0.501348	0.129037		TBR20to40_gldm_GrayLevelVariance	0.502356	0.159153		TBR20to40_gldm_SmallDependenceHighGrayLevelEmphasis	0.505222	0.228577
TTP_min_gldm_DependenceNonUniformityNormalized	0.50121	0.119869		TBR5to15_glrlm_LongRunLowGrayLevelEmphasis	0.502178	0.172355		TBR5to15_glszm_ZoneVariance	0.504333	0.228095
TTP_min_firstorder_90Percentile	0.501183	0.0747217		TBR20to40_glrlm_ShortRunEmphasis	0.501933	0.163982		TBR5to15_gldm_LargeDependenceEmphasis	0.503	0.237074
TTP_min_firstorder_Maximum	0.501183	0.0747217		TBR20to40_glcm_DifferenceVariance	0.501711	0.164244		TTP_min_glszm_GrayLevelNonUniformityNormalized	0.502444	0.231061
TBR5to15_firstorder_Minimum	0.500983	0.127253		TBR20to40_firstorder_Variance	0.501289	0.160825		TBR5to15_glcm_DifferenceAverage	0.502	0.23257
TTP_min_firstorder_Minimum	0.500975	0.0977154		TBR20to40_glrlm_GrayLevelNonUniformityNormalized	0.501267	0.158953		TBR5to15_glrlm_GrayLevelNonUniformity	0.502	0.221685
TBR20to40_glrlm_RunEntropy	0.500909	0.122252		TBR20to40_firstorder_MeanAbsoluteDeviation	0.501178	0.163138		TBR5to15_glrlm_RunPercentage	0.502	0.236165
TBR5to15_gldm_GrayLevelVariance	0.50077	0.129299		TBR20to40_glcm_Contrast	0.501022	0.166583		TTP_min_firstorder_90Percentile	0.500833	0.120038
TBR20to40_gldm_GrayLevelNonUniformity	0.500578	0.116557		TTP_min_firstorder_90Percentile	0.500667	0.107529		TTP_min_firstorder_Maximum	0.500833	0.120038
TBR20to40_firstorder_Range	0.500499	0.130145		TTP_min_firstorder_Maximum	0.500667	0.107529		TBR5to15_ngtdm_Coarseness	0.500556	0.219489
TBR5to15_gldm_DependenceEntropy	0.50043	0.121942		TBR20to40_glcm_DifferenceEntropy	0.5004	0.164507		TBR5to15_glrlm_LongRunEmphasis	0.500222	0.236721
TBR5to15_glcm_SumEntropy	0.500252	0.128984		TBR20to40_glrlm_RunLengthNonUniformityNormalized	0.500089	0.164093		TTP_min_glcm_Imc1	0.5	0.246206
